# Supplementary material for: Hierarchical NiSx/Ni2P nanotube arrays with abundant interfaces for efficient electrocatalytic oxidation of 5-hydroxymethylfurfural
Source: Royal Society of Chemistry journal article supplement (doi:10.1039/d1gc04206h), 2021-12-13
Supplement: d1gc04206h1.pdf [file d1gc04206h1.pdf]

## Supporting information

### Hierarchical NiS<sub>x</sub>/Ni<sub>2</sub>P Nanotube Arrays with Abundant Interfaces for Efficient Electrocatalytic Oxidation of 5-Hydroxymethylfurfural

Baolong Zhang,<sup>a</sup> Hui Fu,<sup>b</sup> Tiancheng Mu,<sup>\*a</sup>

<sup>a</sup> Key Laboratory of Advanced Light Conversion Materials and Biophotonics,  
Department of Chemistry, Renmin University of China, Beijing 100872, China. Tel:  
+86-10-62514925, E-mail: [tcmu@ruc.edu.cn](mailto:tcmu@ruc.edu.cn)

<sup>b</sup>Hui Fu, College of Science, China University of Petroleum (East China), Qingdao,  
266580, China. E-mail: [fuhui@upc.edu.cn](mailto:fuhui@upc.edu.cn)

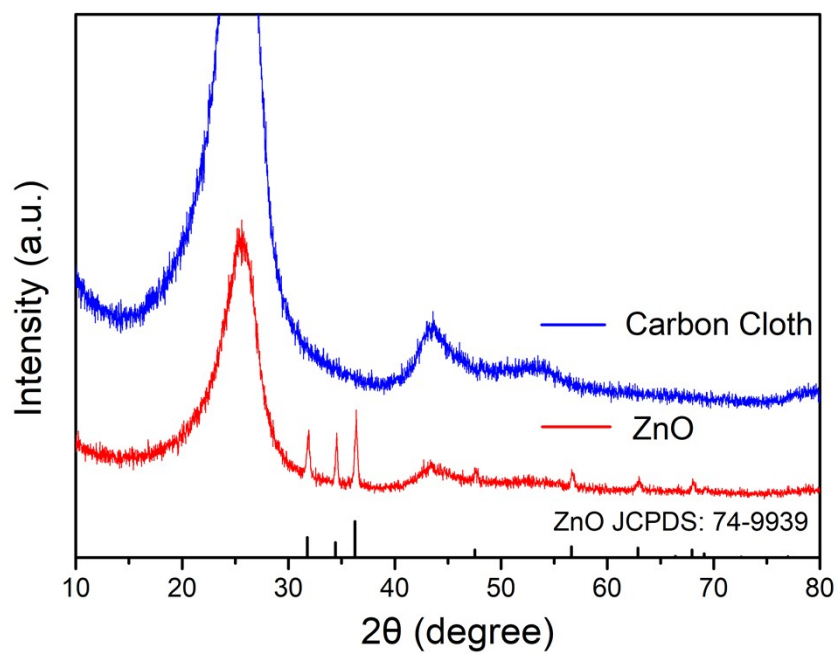

**Fig. S1.** The XRD pattern of ZnO and carbon cloth.

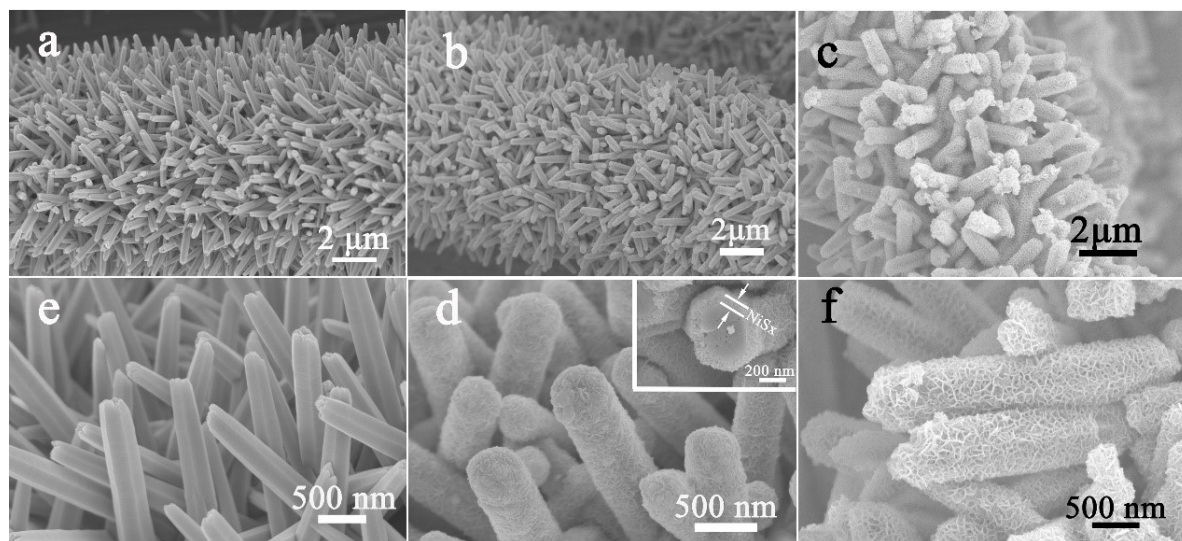

**Fig. S2.** SEM images of ZnO (a, e), ZnO/NiS<sub>x</sub> (b, d), ZnO/NiS<sub>x</sub>/Ni(OH)<sub>2</sub> (c, f) with different magnification.

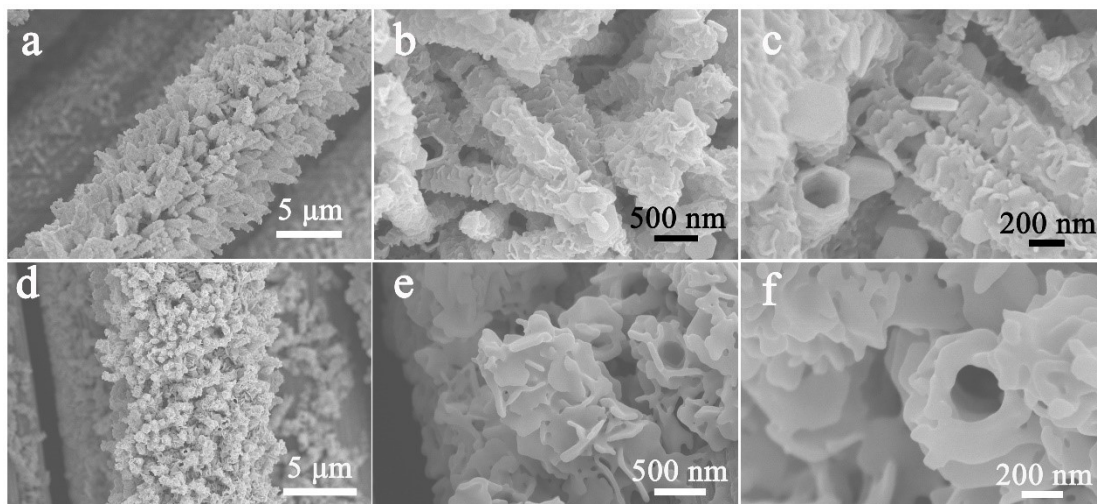

**Fig. S3.** SEM images of CoS<sub>x</sub>/CoP (a, b, c) and FeS<sub>x</sub>/FeP (d, e, f) with different magnification.

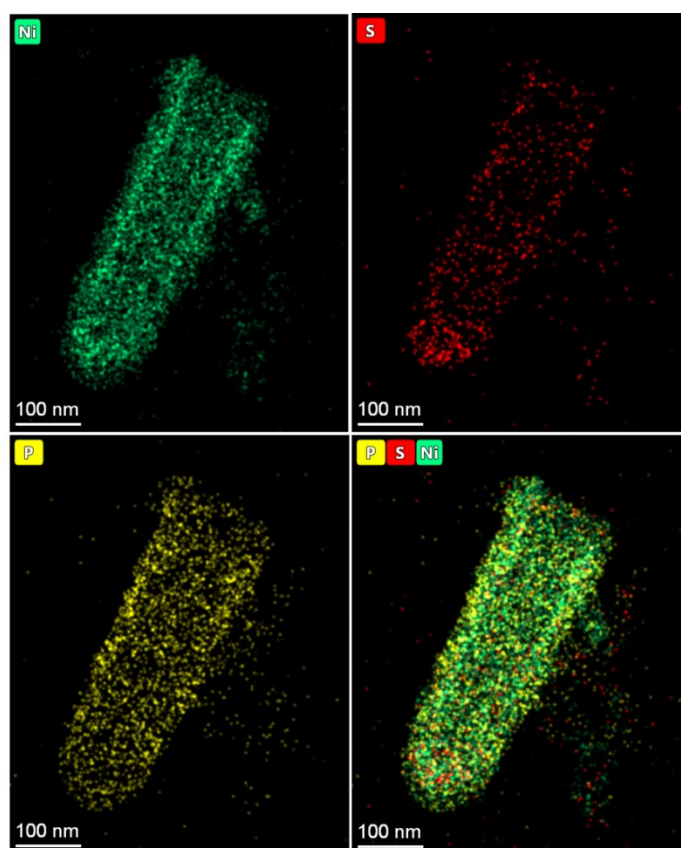

**Fig. S4.** STEM-EDS elemental mapping images of SNP-2.

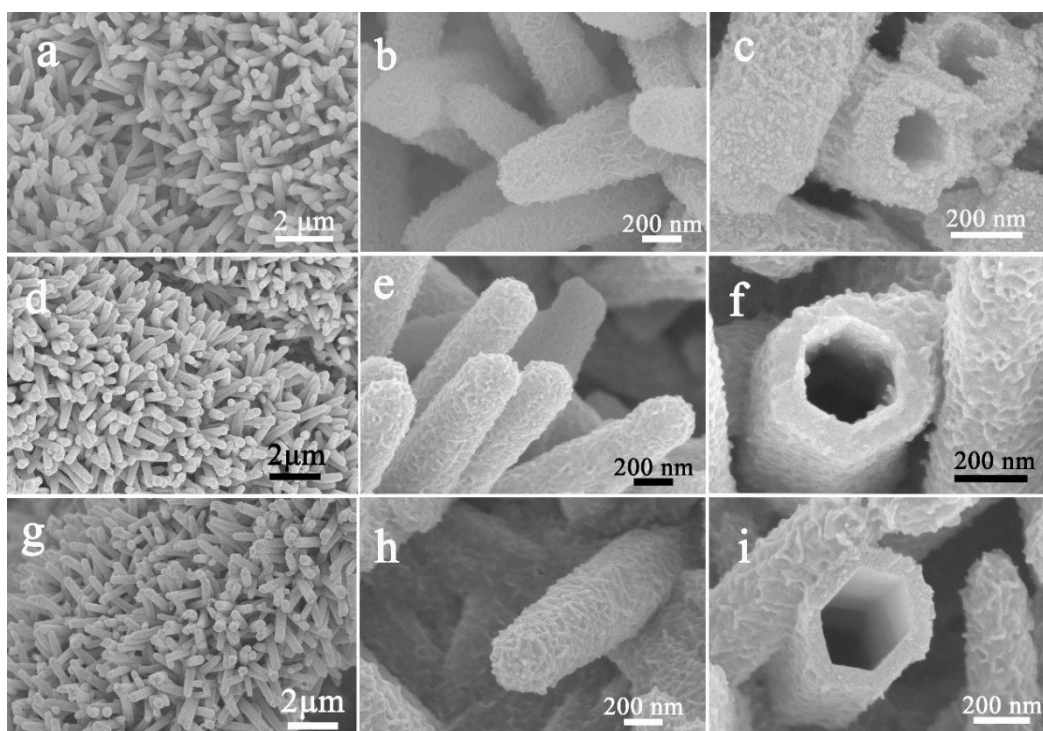

**Fig. S5.** SEM images of NiS<sub>x</sub> (a, b, c), SNP-1 (d, e, f) and SNP-3 (g, h, i) with different magnification.

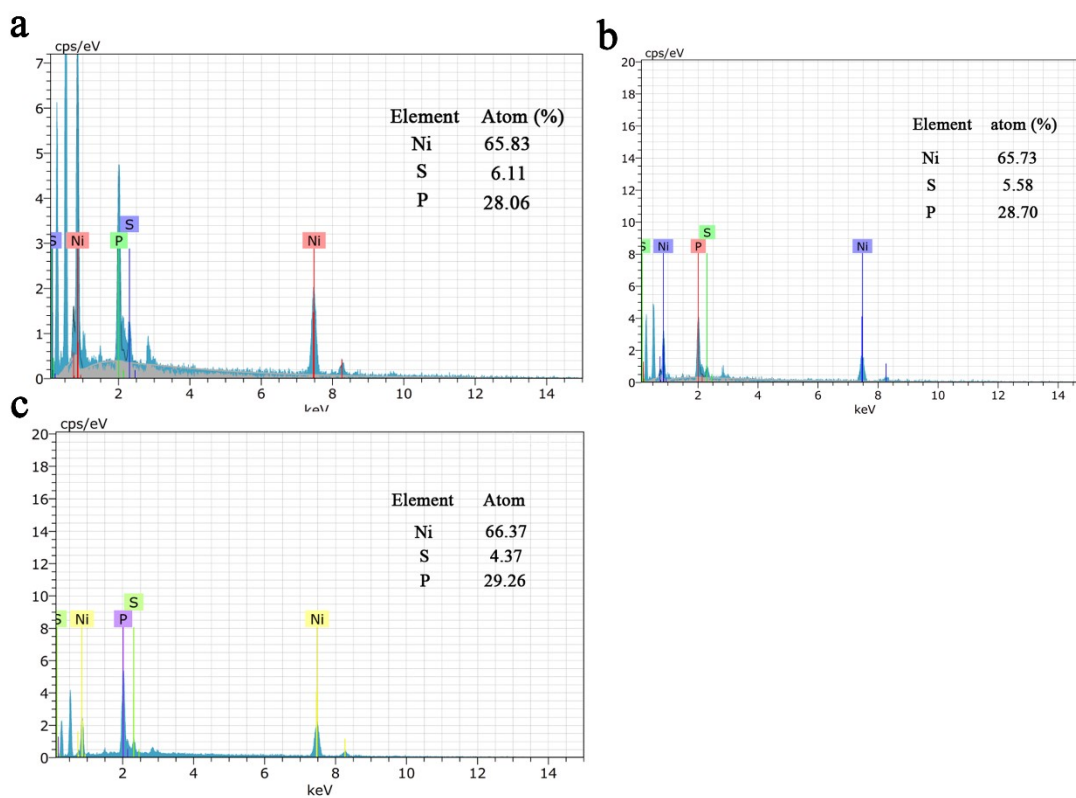

**Fig. S6.** EDS quantitative analysis of SNP-1, SNP-2 (b) and SNP-3 (c).

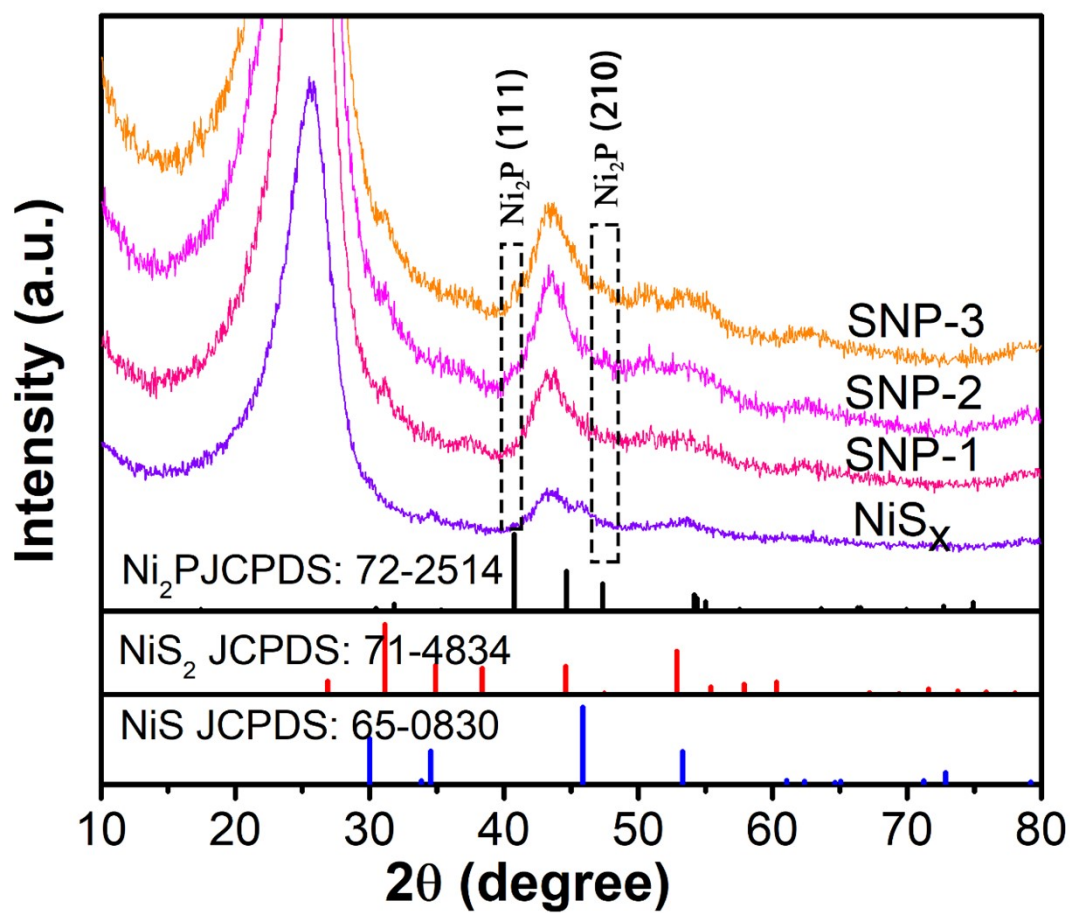

Fig. S7. The XRD patterns of  $\text{NiS}_x$  and  $\text{NiS}_x/\text{Ni}_2\text{P}$  hybrid materials.

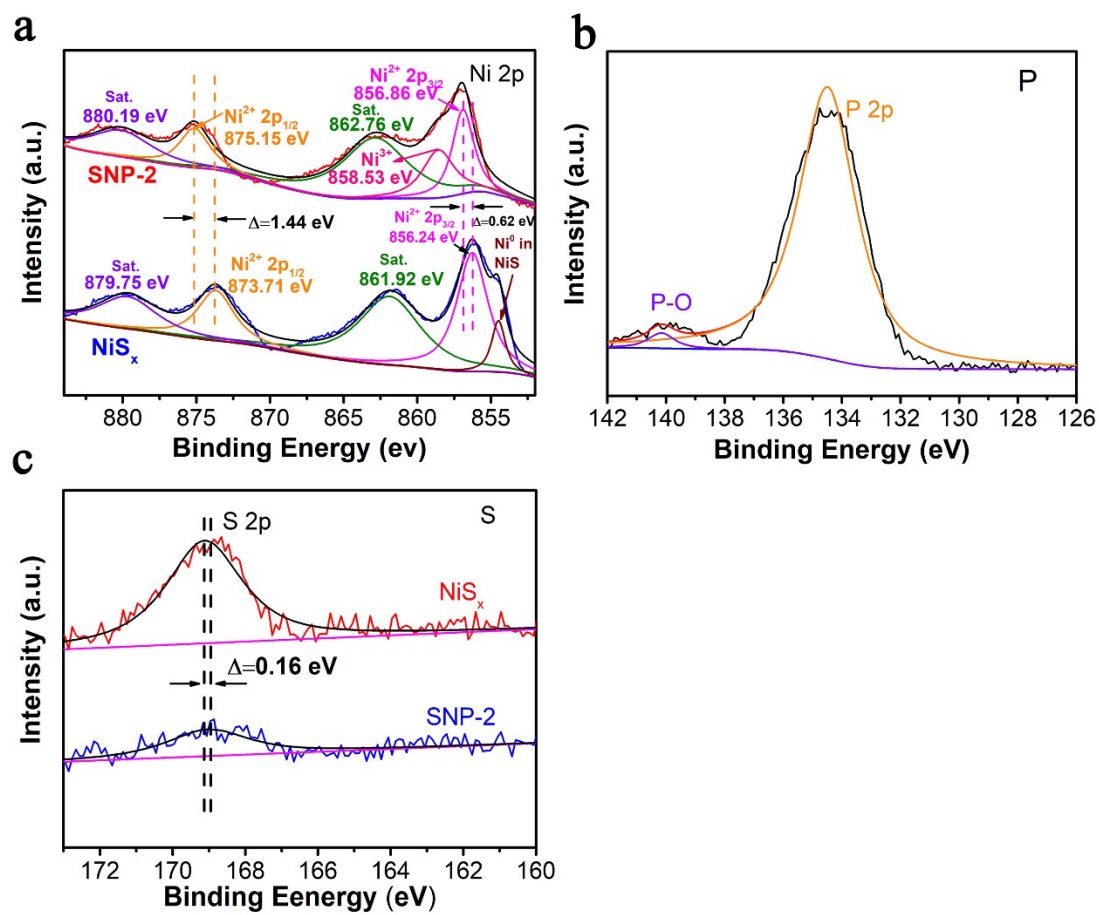

Fig. S8. XPS spectrums of SNP-2 about Ni 2p (a), P 2p (b) and S 2p (c)

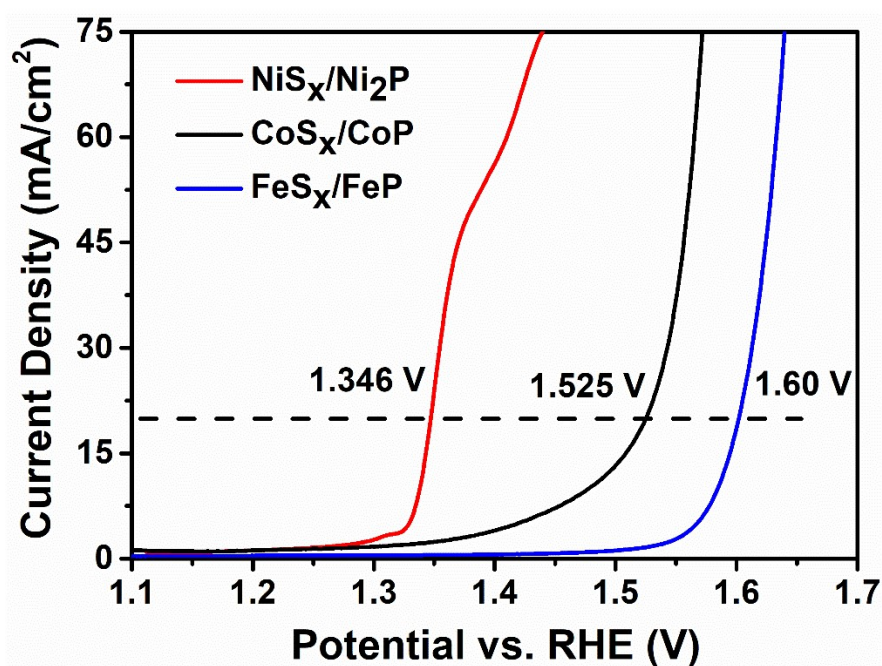

Fig. S9. LSV curves of SNP-2, CoS<sub>x</sub>/CoP and FeS<sub>x</sub>/FeP in 1 M KOH with 10 mM HMF.

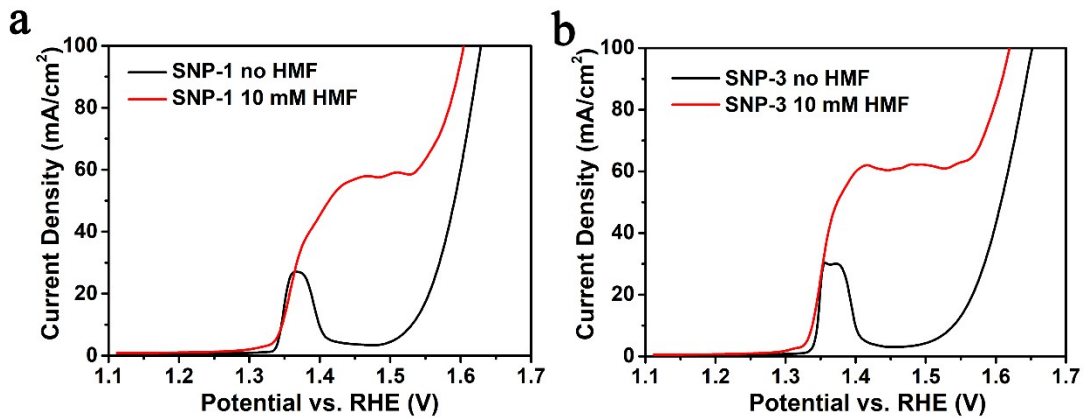

**Fig. S10.** LSV curves of SNP-1 (a) and SNP-3 (b) in 1 M KOH with/without HMF.

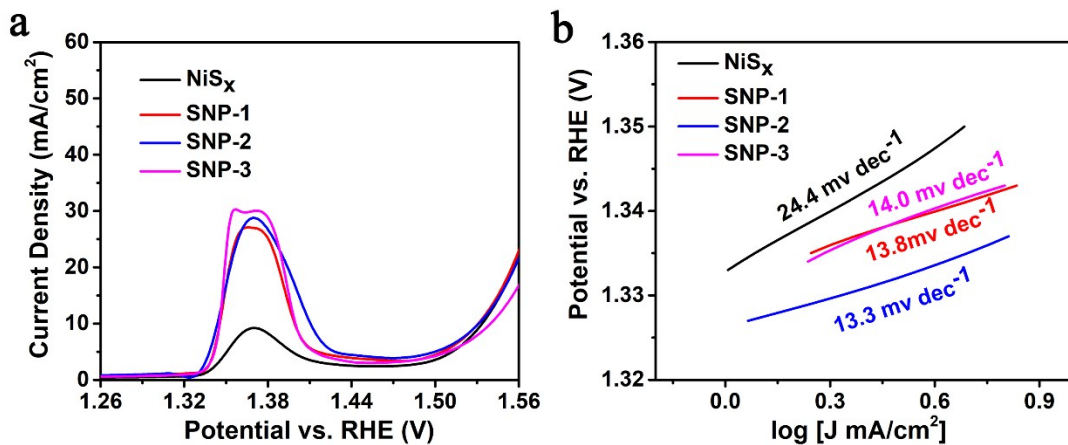

**Fig. S11** LSV curves of different catalysts in 1.0 M KOH electrolyte and Tafel slopes of derived from LSVs

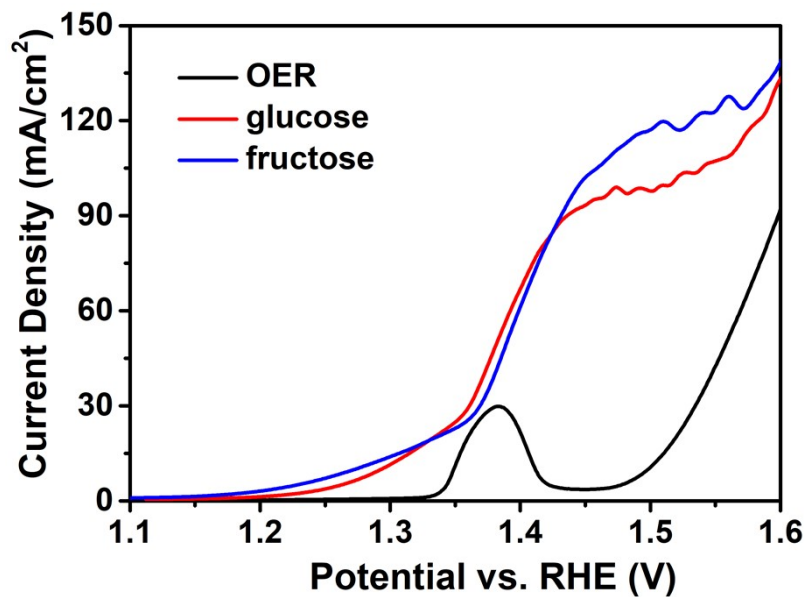

**Fig. S12.** LSV curves of SNP-2 in 1.0 M KOH electrolyte with 10 mM glucose (red line) and 10 mM fructose (blue line).

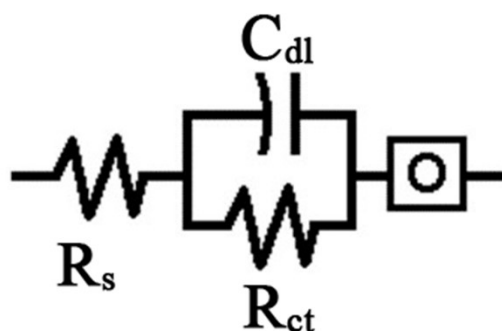

**Fig. S13.** Equivalent circuit applied to analyze the electrochemical impedance spectroscopy

$R_s$  stands for the solution resistance,  $C_{dl}$  represents double layer capacitance,  $R_{ct}$  has contact with the interfacial charge transfer reaction,  $O$  stands for finite layer diffusion impedance of a planar electrode.

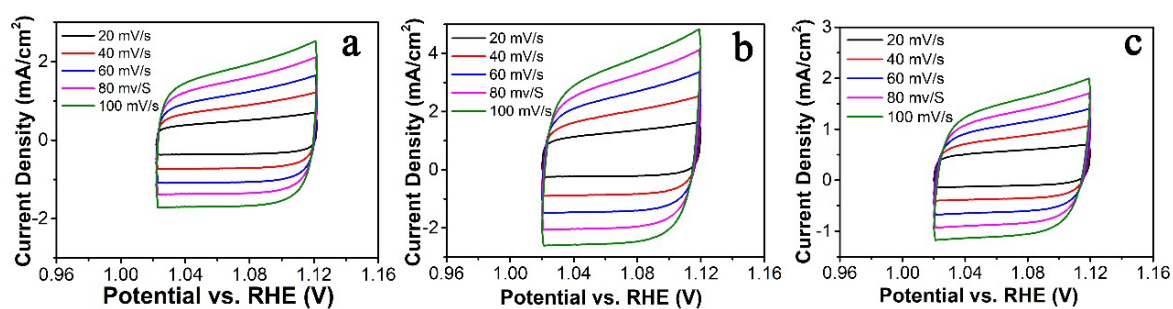

**Fig. S14.** The polarization curves of  $NiS_x$  (a), SNP-2 (b) in 1 M KOH with 10 mM HMF and without HMF (c) at different scan rates from 20 to 100 mV/s.



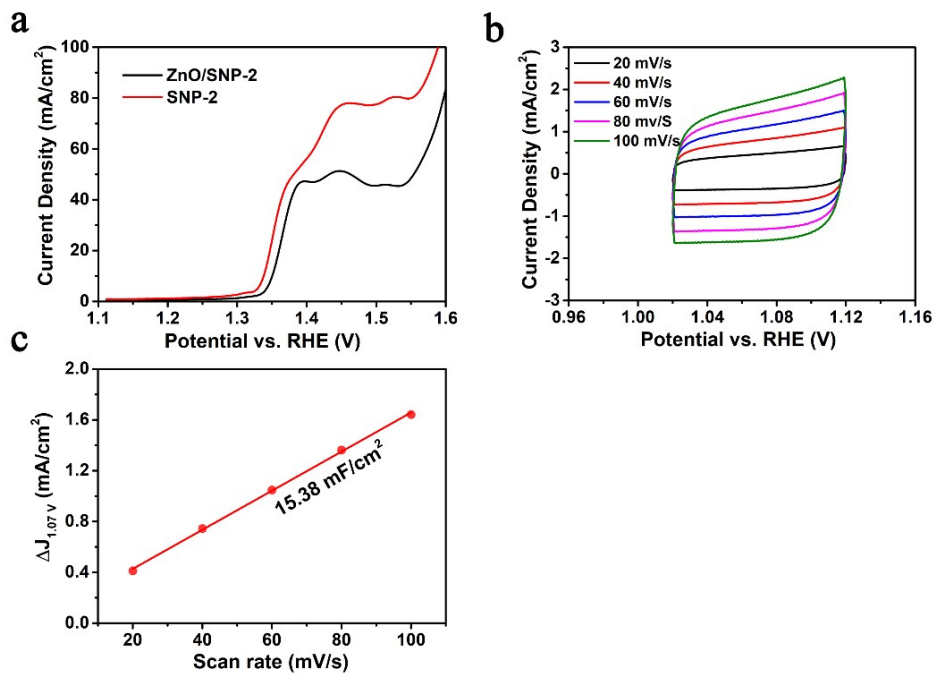

**Fig. S15.** (a) LSV curves of SNP-2 and ZnO/SNP-2 in 1 M KOH with 10 mM HMF. (b) The polarization curves of ZnO/SNP-2 in 1 M KOH with 10 mM HMF at different scan rates from 20 to 100 mV/s. (c) Change of current density plotted against for the scan rate at 1.07 V vs RHE for ZnO/SNP-2.

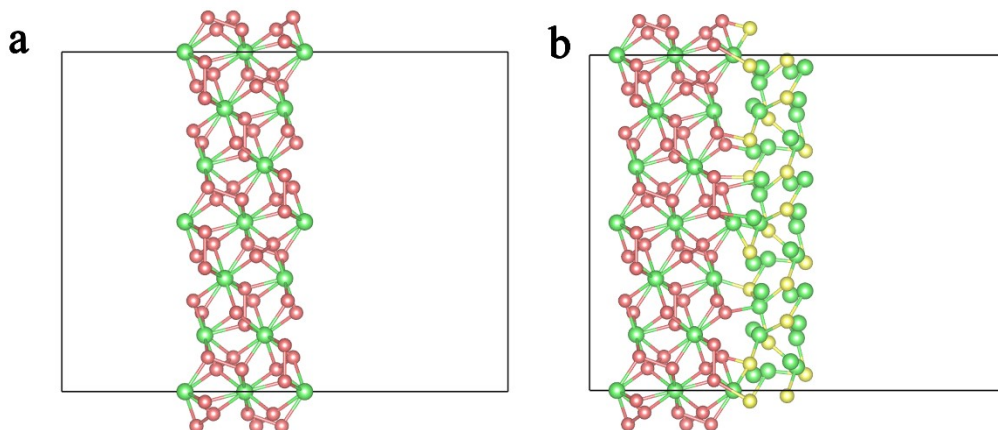

**Fig. S16.** a) The side view of NiS<sub>2</sub> (211) (Ni atom in green, S atom in red). b) The side view of the SNP-2 (Ni atom in green, S atom in red, P atom in yellow).

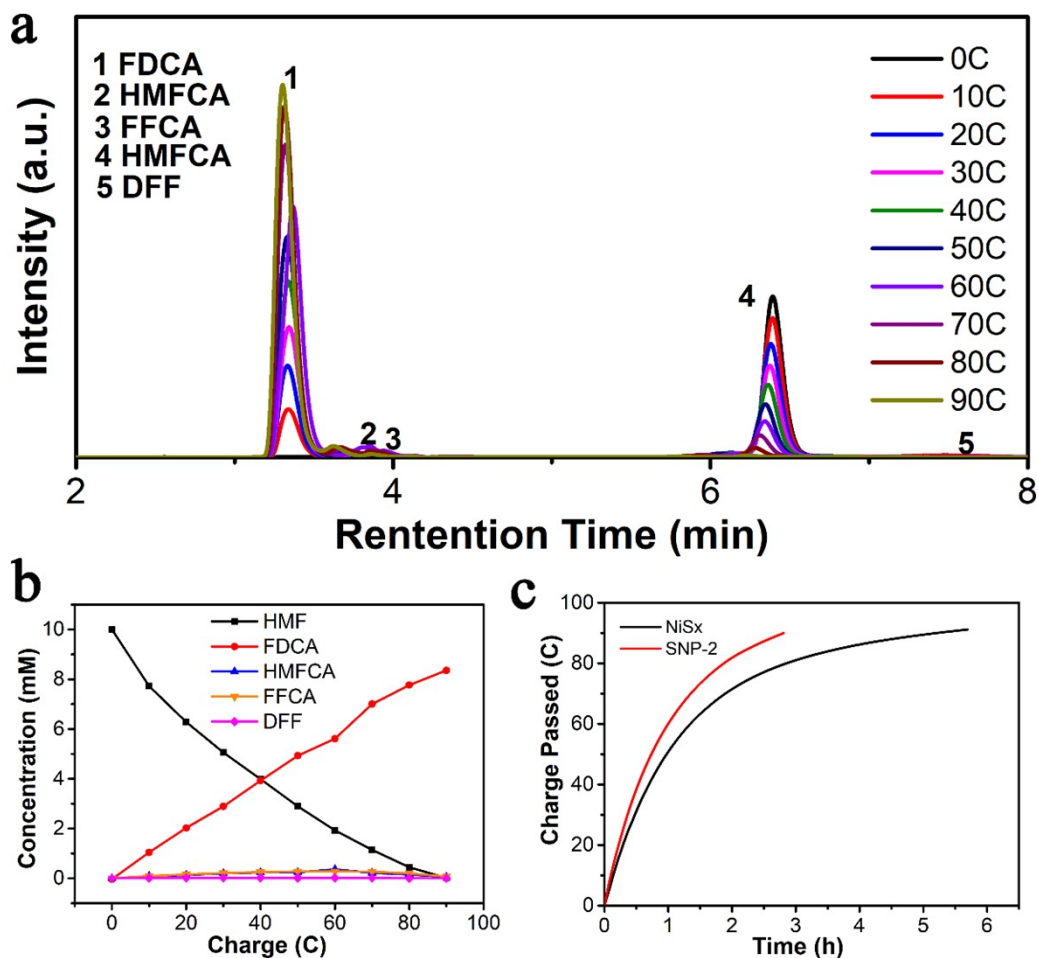

**Fig. S17.** HPLC traces of electrolysis of HMF oxidation catalyzed by NiS<sub>x</sub> at 1.46 V vs RHE in 15 mL, 1 M KOH with 10 mM HMF. b) Conversion or yield of HMF and its oxidation products catalyzed by NiS<sub>x</sub> during electrolysis. c) charge-time transients of NiS<sub>x</sub> and SNP-2 during the electrochemical oxidation of HMF.

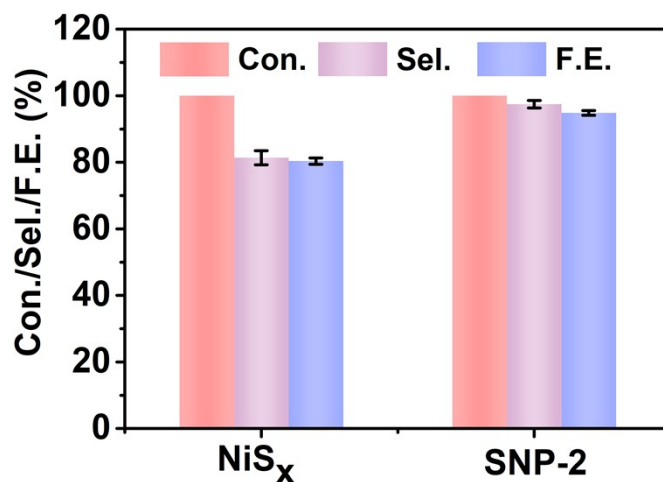

**Fig. S18.** Comparison of the conversion efficiency, yield and FE between SNP-2 and NiS<sub>x</sub>.

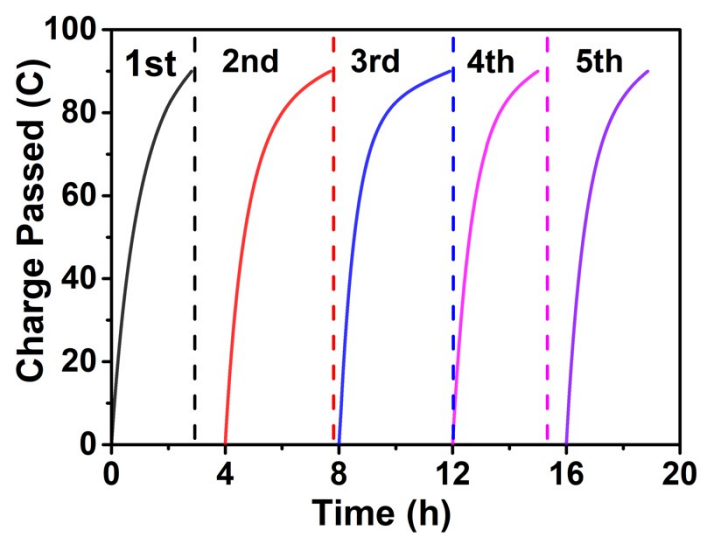

**Fig. S19.** charge-time transients during the electrochemical oxidation of HMF.

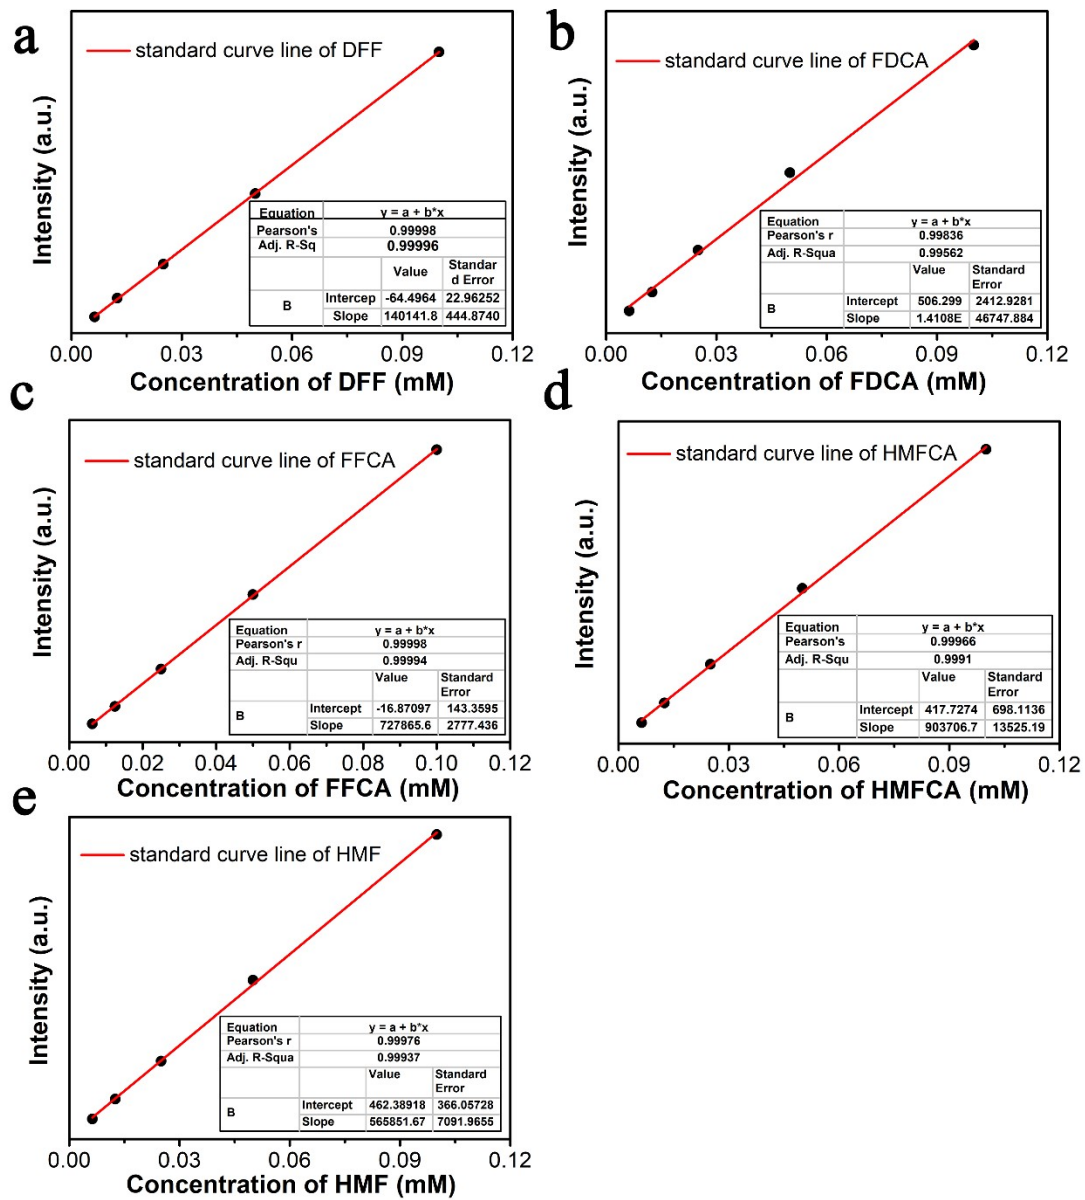

Fig. S20. Calibration of the HPLC for DFF (a), FDCA (b), FFCA (c), HMFCFA (d), HMF (e).

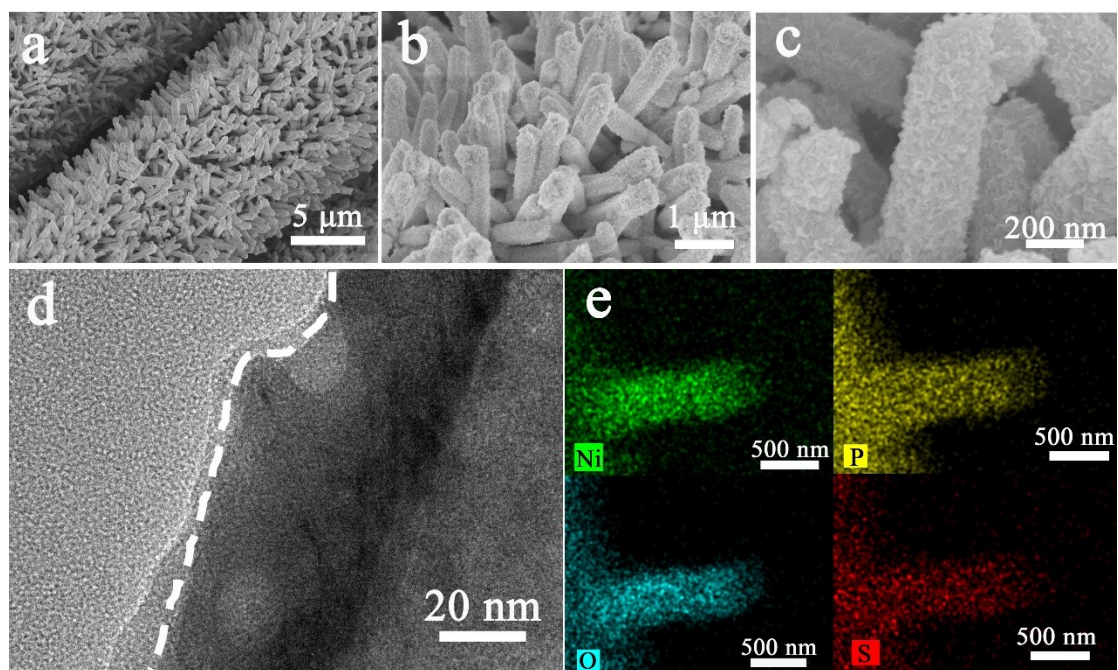

**Fig. S21.** SEM images of post-SNP-2 (a, b, c) with different magnification. d) TEM images of post-SNP-2. e) EDX elemental mapping of post-SNP-2.

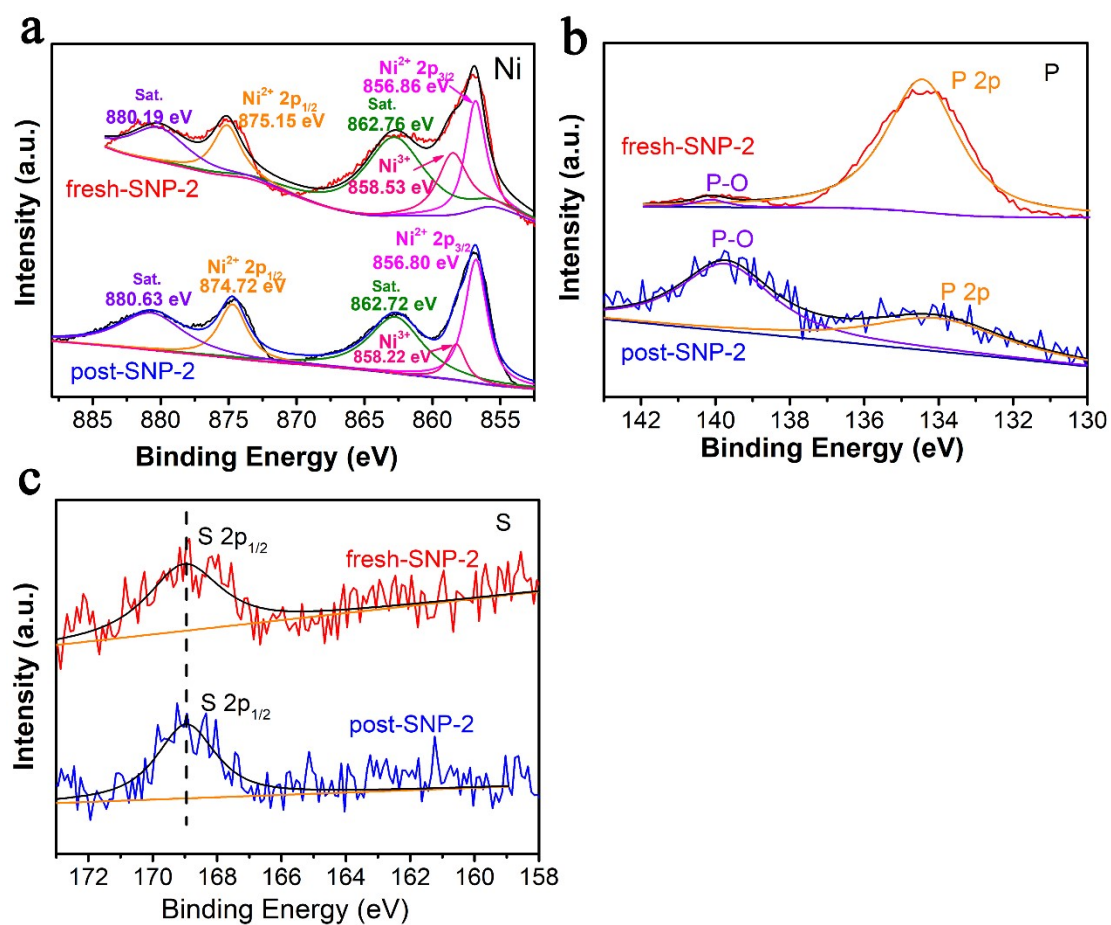

**Fig. S22.** XPS spectrums of Ni 2p, P 2p and S 2p of pos-SNP-2 and fresh-SNP-2.

**Table S1.** The proposed equivalent circuit

| Samples         | NiS <sub>x</sub>      | SNP-2                 | SNP-2     |
|-----------------|-----------------------|-----------------------|-----------|
| Electrolyte     | 1.0 M KOH + 50 mM HMF | 1.0 M KOH + 50 mM HMF | 1.0 M KOH |
| R <sub>s</sub>  | 1.649                 | 1.681                 | 1.658     |
| C <sub>dl</sub> | 0.0045                | 0.2845                | 0.7335    |
| R <sub>ct</sub> | 4.21                  | 2.9                   | 58.88     |
| O               | 1.23                  | 0.8193                | 7.363     |

**Table S2.** The calculated charge values (Q, q) in the case of HMF adsorbing on NiS<sub>x</sub> and SNP-2 surfaces, respectively.

| Samples          | Q (Ni) | Q (S) | Q (P) | Q (HMF) |
|------------------|--------|-------|-------|---------|
| NiS <sub>x</sub> | -14.45 | 14.38 | 0     | 0.065   |
| SNP-2            | -18.96 | 14.69 | 4.18  | 0.081   |

**Table S3.** HMF electrocatalytic performance of non-noble metal catalysts.

| Catalyst                               | E <sub>onset</sub> (V vs. RHE) | E <sub>j = 20 mA/cm<sup>2</sup></sub> (V) | FDCA  | Ref.      |
|----------------------------------------|--------------------------------|-------------------------------------------|-------|-----------|
| NiS <sub>x</sub> /Ni <sub>2</sub> P    | 1.25                           | 1.346                                     | 98.5  | This work |
| Ni <sub>3</sub> S <sub>2</sub> /NF     | ~1.35                          | ~1.36                                     | 98.0  | 1         |
| Ni <sub>2</sub> P NPA/NF               | ~1.35                          | ~1.37                                     | 100.0 | 2         |
| NiP-Al <sub>2</sub> O <sub>3</sub> /NF | ~1.38                          | ~1.41                                     | 99.6  | 3         |
| Ni <sub>x</sub> B                      | ~1.38                          | ~1.41                                     | 98.5  | 4         |
| Ni <sub>3</sub> N/C                    | 1.25                           | 1.36                                      | 98    | 5         |
| NiCoBDC-NF                             | ~1.38                          | ~1.60                                     | 99.0  | 6         |
| Ni(OH) <sub>2</sub> /NF                | ~1.25                          | 1.33                                      | 96.0  | 7         |
| NiSe@NiO <sub>x</sub>                  | ~1.25                          | 1.35                                      | 99.0  | 8         |

|                                        |       |       |       |    |
|----------------------------------------|-------|-------|-------|----|
| om-Co <sub>3</sub> O <sub>4</sub>      | 1.30  | ~1.45 | >99.8 | 9  |
| NiCo <sub>2</sub> O <sub>4</sub>       | ~1.23 | >1.6  | 90.8  | 10 |
| CoO-CoSe                               | 1.30  | 1.38  | 99.0  | 11 |
| CuNi(OH) <sub>2</sub> /C               | 1.38  | 1.75  | 93.0  | 12 |
| VN                                     | 1.34  | 1.37  | 96.0  | 13 |
| MoO <sub>2</sub> /FeP                  | 1.35  | 1.38  | 98.6  | 14 |
| NiFe LDH                               | 1.25  | 1.32  | 98.0  | 15 |
| NiCoFe LDH                             | 1.23  | 1.51  | 84.9  | 16 |
| Ni(NS)/CC                              | 1.25  | 1.47  | >99.0 | 17 |
| t-Ni <sub>1</sub> Co <sub>1</sub> -MOF | 1.25  | 1.28  | 100.0 | 18 |
| Pt/Ni(OH) <sub>2</sub>                 | 1.36  | 1.42  | 98.7  | 19 |

## References

1. B. You, X. Liu, N. Jiang and Y. Sun, *J. Am. Chem. Soc.*, 2016, **138**, 13639-13646.
2. B. You, N. Jiang, X. Liu and Y. Sun, *Angew. Chem. Int. Ed.*, 2016, **55**, 9913-9917.
3. M. Li, L. Chen, S. Ye, G. Fan, L. Yang, X. Zhang and F. Li, *J. Mater. Chem. A*, 2019, **7**, 13695-13704.
4. S. Barwe, J. Weidner, S. Cychy, D. M. Morales, S. Dieckhöfer, D. Hiltrop, J. Masa, M. Muhler and W. Schuhmann, *Angew. Chem. Int. Ed.*, 2018, **57**, 11460-11464.
5. N. Zhang, Y. Zou, L. Tao, W. Chen, L. Zhou, Z. Liu, B. Zhou, G. Huang, H. Lin and S. Wang, *Angew. Chem. Int. Ed.*, 2019, **58**, 15895-15903.
6. M. Cai, Y. Zhang, Y. Zhao, Q. Liu, Y. Li and G. Li, *J. Mater. Chem. A*, 2020, **8**, 20386-20392.
7. J. Zhang, W. Gong, H. Yin, D. Wang, Y. Zhang, H. Zhang, G. Wang and H. Zhao, *ChemSusChem*, 2021, **14**, 2935-2942.
8. L. Gao, Z. Liu, J. Ma, L. Zhong, Z. Song, J. Xu, S. Gan, D. Han and L. Niu, *Appl. Catal. B: Environ.*, 2020, **261**, 118235.
9. C. Wang, H.-J. Bongard, M. Yu and F. Schüth, *ChemSusChem*, 2021, **14**, 1-9.
10. M. J. Kang, H. Park, J. Jegal, S. Y. Hwang, Y. S. Kang and H. G. Cha, *Appl. Catal. B: Environ.*, 2019, **242**, 85-91.
11. X. Huang, J. Song, M. Hua, Z. Xie, S. Liu, T. Wu, G. Yang and B. Han, *Green Chem.*, 2020, **22**, 843-849.
12. H. Chen, J. Wang, Y. Yao, Z. Zhang, Z. Yang, J. Li, K. Chen, X. Lu, P. Ouyang and J. Fu, *ChemElectroChem*, 2019, **6**, 5797-5801.

13. S. Li, X. Sun, Z. Yao, X. Zhong, Y. Cao, Y. Liang, Z. Wei, S. Deng, G. Zhuang, X. Li and J. Wang, *Adv. Funct. Mater.*, 2019, **29**, 1904780.
14. G. Yang, Y. Jiao, H. Yan, Y. Xie, A. Wu, X. Dong, D. Guo, C. Tian and H. Fu, *Adv. Mater.*, 2020, **32**, 2000455.
15. W.-J. Liu, L. Dang, Z. Xu, H.-Q. Yu, S. Jin and G. W. Huber, *ACS Catal.*, 2018, **8**, 5533-5541.
16. M. Zhang, Y. Liu, B. Liu, Z. Chen, H. Xu and K. Yan, *ACS Catal.*, 2020, **10**, 5179-5189.
17. X. Lu, K.-H. Wu, B. Zhang, J. Chen, F. Li, B.-J. Su, P. Yan, J.-M. Chen and W. Qi, *Angew. Chem. Int. Ed.*, 2021, **60**, 14528-14535.
18. X. Deng, M. Li, Y. Fan, L. Wang, X.-Z. Fu and J.-L. Luo, *Appl. Catal. B: Environ.*, 2020, **278**, 119339.
19. S. Wang, B. Zhou, Y. Li, Y. Zou, W. Chen, W. Zhou, M. Song, Y. Wu, Y. Lu, J. Liu and Y. Wang, *Angew. Chem. Int. Ed.*, 2021, DOI: <https://doi.org/10.1002/anie.202109211>.
